# Supplementary material
Source: publisher figshare collection journal article supplement (https://karger.figshare.com/ndownloader/files/31569548)
Supplement: Supplementary file 1 [file 31569548]

**Supplementary Table 1: Guideline for SPC counselling**

| General aspects:  Personal consultation interview of approximately 60 minutes (45 – 90 min)  Primary consultation by a specialist for palliative care  Palliative care nurses, social workers and psychologists should be included as needed.  Content that has to be addressed in every consultation:   - Typical symptoms of advanced cancer and their treatment options - Pain - Weakness, tiredness, fatigue - Dry mounth - Nausea and emesis - Loss of appetite - Dyspnoe - Changes and challenges when nearing end of life - Different structures of palliative and hospice care - Specific local structures of palliative and hospice care, including hand out of contact addresses - Specific structures of palliative care at the comprehensive cancer center, hand out of important contact addresses - Advance directives (patient decree and power of attorney), including offer of templates   Explicitly ask if there are any further questions, problems or needs concerning the patients himself/herself or his/her family caregivers.  Potential consequences:   - Recommendation for medical or non-medical treatment of symptom burden - Preparing a patient decree and/or power of attorney together - Transferring the patient to a specialist outpatient palliative care or hospice service - Recommendation of further forms of specialized counselling - Admitting the patient to the palliative care ward - Planning further palliative care counselling |
| --- |
